# Supplementary material for: Enhanced Antioxidant Effects of the Anti-Inflammatory Compound Probucol When Released from Mesoporous Silica Particles
Source: MDPI journal article supplement (doi:10.3390/pharmaceutics14030502), 2022-02-24
Supplement: s1 [file s1]

# Supplementary Materials: Enhanced Antioxidant Effects of the Anti-inflammatory Compound Probucol when Released from Mesoporous Silica Particles

Michael Lau, Benjamin Sealy, Valery Combes, Marco Morsch and Alfonso E. Garcia-Bennett

**Table S1.** Structural and textural data of AMS-6 particles utilized in this work. The unit cell parameter,  $a_o$ , was obtained from powder X-ray diffraction. The average pore volume, average pore size and surface area ( $P_{vol}$ ,  $P_{size}$ , and  $S_{ABET}$ , respectively) were obtained from nitrogen sorption measurements. Reduction in the pore size and surface area of NH<sub>2</sub>-AMS-6 compared to CAL-AMS-6 was due to the presence of the functional propylamine groups within the internal surface of NH<sub>2</sub>-AMS-6 MSP. Further reduction in pore volume and surface area was observed in the FITC-AMS-6 when compared to NH<sub>2</sub>-AMS-6 indicating the presence of FITC within the mesopores. The  $HD_{size}$  was measured in PBS buffer, whilst the  $\zeta$ -potential was measured in distilled water. The  $\zeta$ -potential of CAL-AMS-6 was negative due to the presence of surface silanol groups. The NH<sub>2</sub>-AMS-6 MSP showed the highest hydrodynamic ( $HD_{size}$ ) particle size due to particle agglomeration, and a positive  $\zeta$ -potential due to the presence of amine groups.

| MSP                    | $a_o$ ,<br>Å | $P_{vol}$ ,<br>cm <sup>3</sup> /g | $P_{size}$ ,<br>Å | $S_{ABET}$ ,<br>m <sup>2</sup> /g | $HD_{size}$ , nm<br>(± STD) | $\zeta$ -potential,<br>mv (± STD) |
|------------------------|--------------|-----------------------------------|-------------------|-----------------------------------|-----------------------------|-----------------------------------|
| AS-AMS-6               | 115.3        | -                                 | -                 | -                                 | 594 (8)                     | 36.3(3.0)                         |
| CAL-AMS-6              | 114.8        | 0.75                              | 46.7              | 777.3                             | 564(18)                     | 28.5(0.6)                         |
| NH <sub>2</sub> -AMS-6 | 118.8        | 0.39                              | 37.9              | 470.5                             | 749(24.1)                   | 29.6(0.8)                         |
| FITC-AMS-6             | 100.7        | 0.35                              | 36.2              | 401.5                             | 782 (25.1)                  | 30.8(0.4)                         |

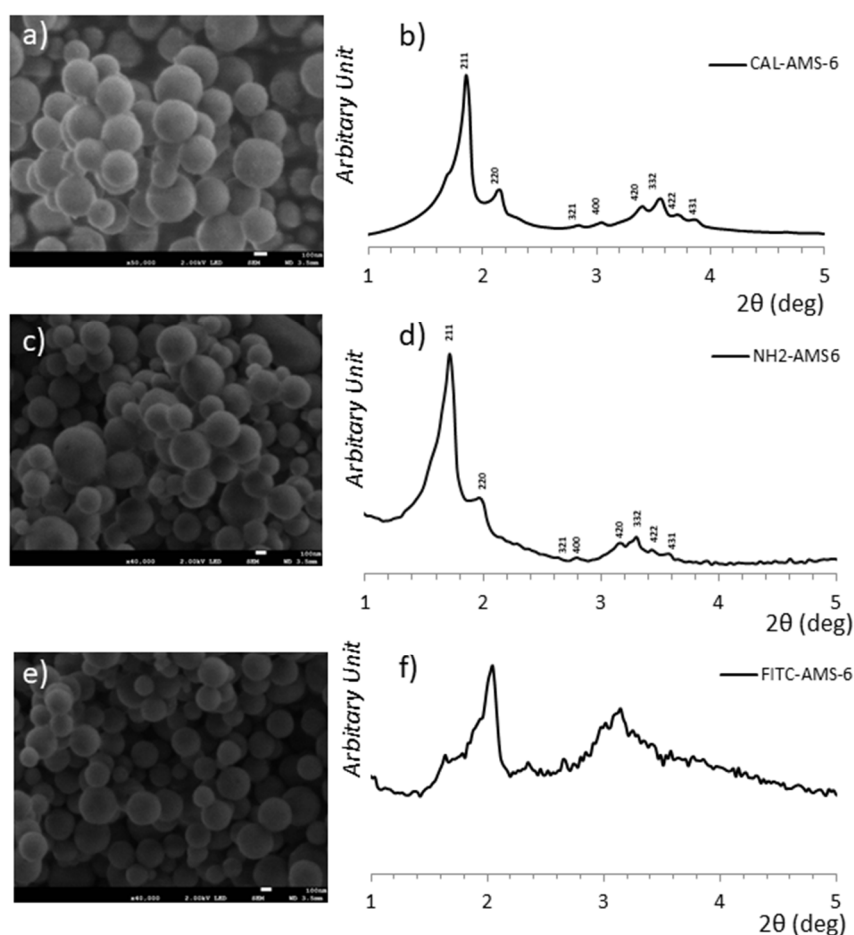

**Figure S1.** SEM and XRD scans of mesoporous materials, (a,b) CAL-AMS-6, (c,d) NH<sub>2</sub>-AMS-6, (e,f) FITC-AMS-6.

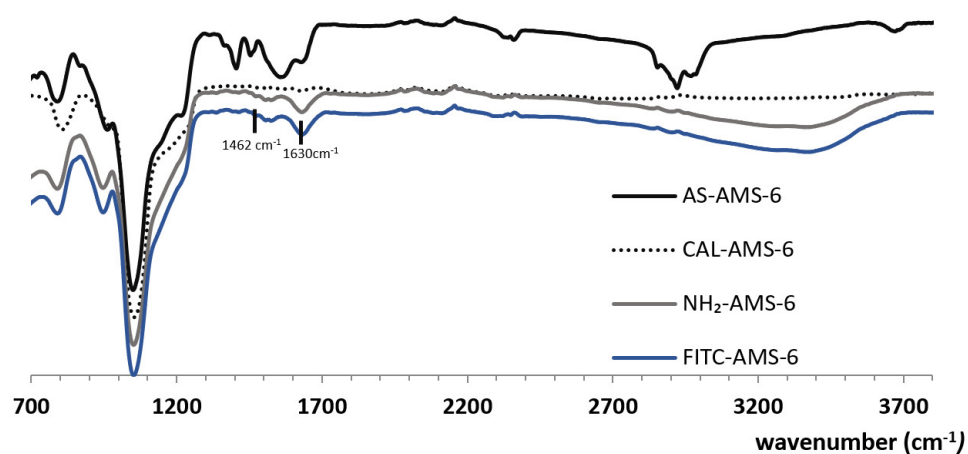

**Figure S2.** FT-IR spectra of the as-synthesised MSP (AS-AMS-6), CAL-AMS-6, NH<sub>2</sub>-AMS-6, and FITC-AMS-6 materials. The absorption bands of the 1000–1200 cm<sup>−1</sup> (Si-O-Si asymmetric stretching), 965 cm<sup>−1</sup> (Si-O stretching) and 801 cm<sup>−1</sup> (Si-O-Si symmetric stretching) is present in all MSP and represent the peaks of the silica framework [1]. The absorption peak at 1462 cm<sup>−1</sup> is attributed to the reaction between the amino groups (-NH<sub>2</sub>) on NH<sub>2</sub>-AMS-6 and the isothiocyanate groups (-N=C=S) from FITC [2]. The presence of NH<sub>2</sub> groups in NH<sub>2</sub>-AMS-6 and FITC-AMS-6 materials is attributed

to the stretching band at  $1630\text{ cm}^{-1}$  [2]. The broad band between  $3200$  and  $3700\text{ cm}^{-1}$  is attributed to the O-H bond stretching of the surface silanol groups and the adsorbed water molecule [3].

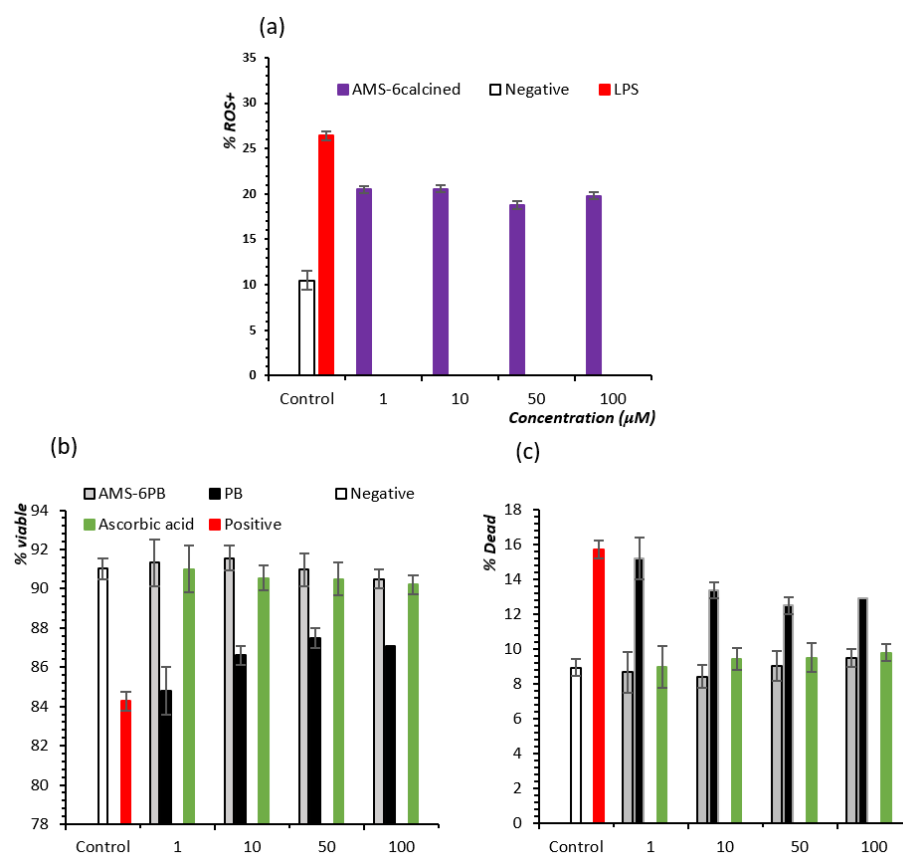

**Figure S3.** (a) Concentration dependent effects of mesoporous silica AMS-6 on the generation of ROS+ HBEC cells after 24 h incubation with  $1\text{ }\mu\text{g/mL}$  LPS. (b,c) Percentage of viable and dead cells after addition of PB, AMS-6PB or ascorbic acid after 24 h incubation with  $1\text{ }\mu\text{g/mL}$  LPS. The positive control (red bar) are cells incubated with  $1\text{ }\mu\text{g/mL}$  LPS and negative control (white bar) is cells incubated with media only for 24 h.

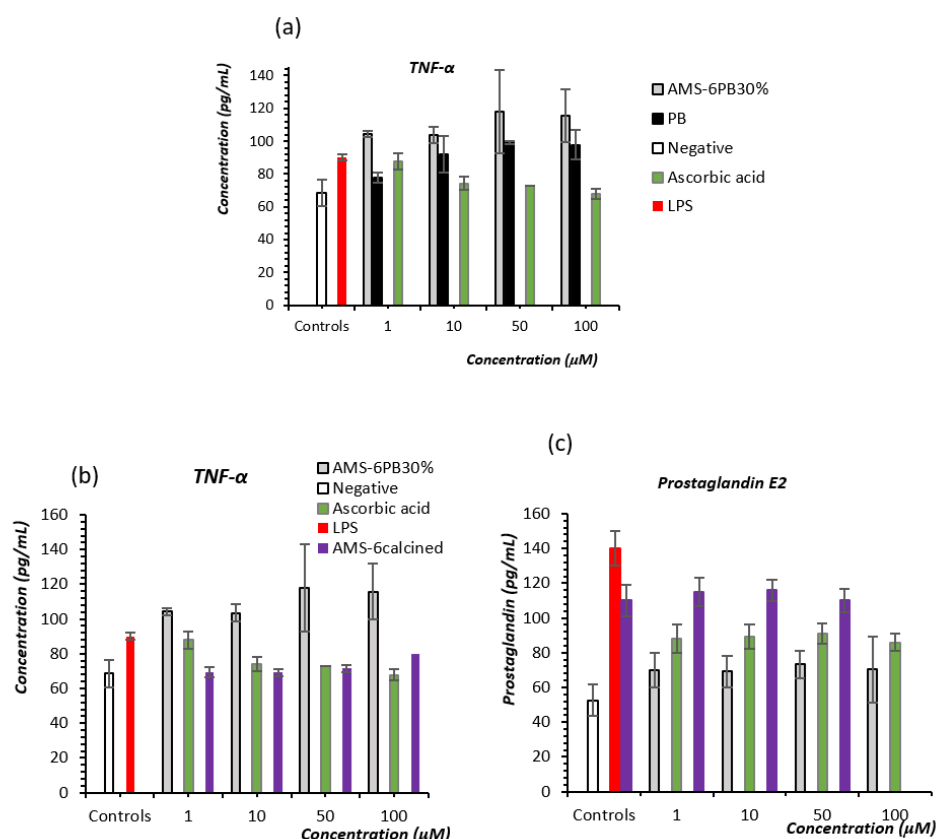

**Figure S4.** (a) Concentration dependent effects of the test compounds on the generation of TNF-α in HBEC cells after 24 h incubation with 1 μg/mL LPS. (b) Concentration dependent effects of mesoporous silica AMS-6, AMS-6PB and ascorbic acid on the generation of TNF-α in HBEC cells after 24 h incubation with 1 μg/mL LPS. (c) Concentration dependent effects of mesoporous silica AMS-6, AMS-6PB and ascorbic acid on the generation of prostaglandin E<sub>2</sub> in HBEC cells after 24 hours incubation with 1 μg/mL LPS. The positive control (red bar) are cells incubated with 1 μg/mL LPS and negative control (white bar) is cells incubated with media only for 24 h.

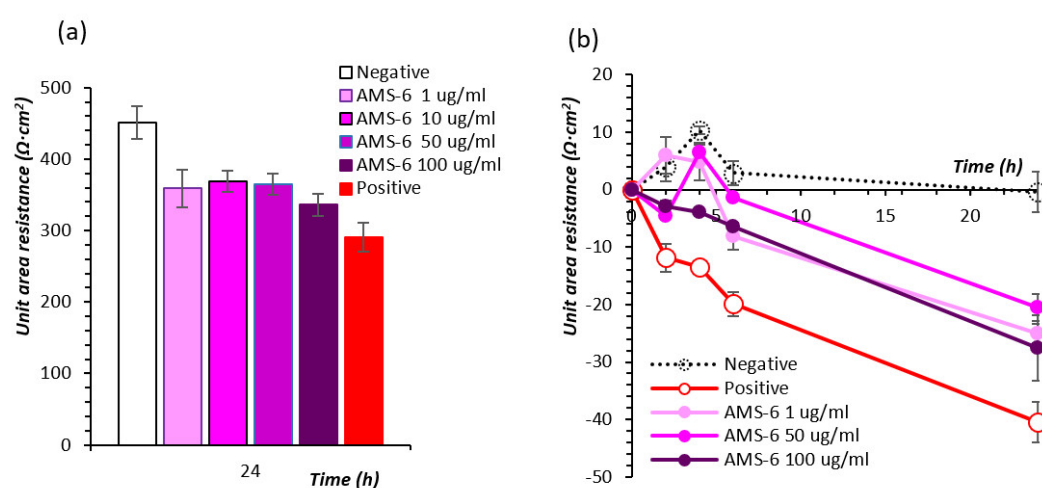

**Figure S5.** (a) Absolute TEER electrical resistance measurements conducted on monolayers of HBEC as a BBB integrity model incubated with 1 μg/mL LPS and mesoporous silica AMS-6 particles alone after 24-h incubation. (b) Time dependent normalized resistance measurements at 1 μM, 50 μM and 100 μM mesoporous silica particles of AMS-6 alone with 1 μg/mL LPS, compared to controls.

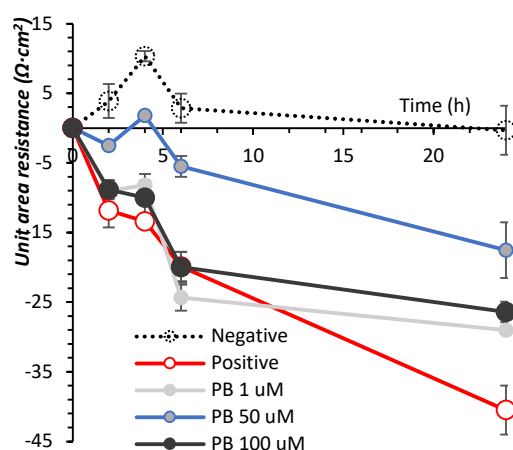

**Figure S6.** Time dependent normalized resistance measurements at 1 $\mu$ M, 50 $\mu$ M and 100 $\mu$ M for PB, with 1  $\mu$ g/mL LPS, compared to controls.

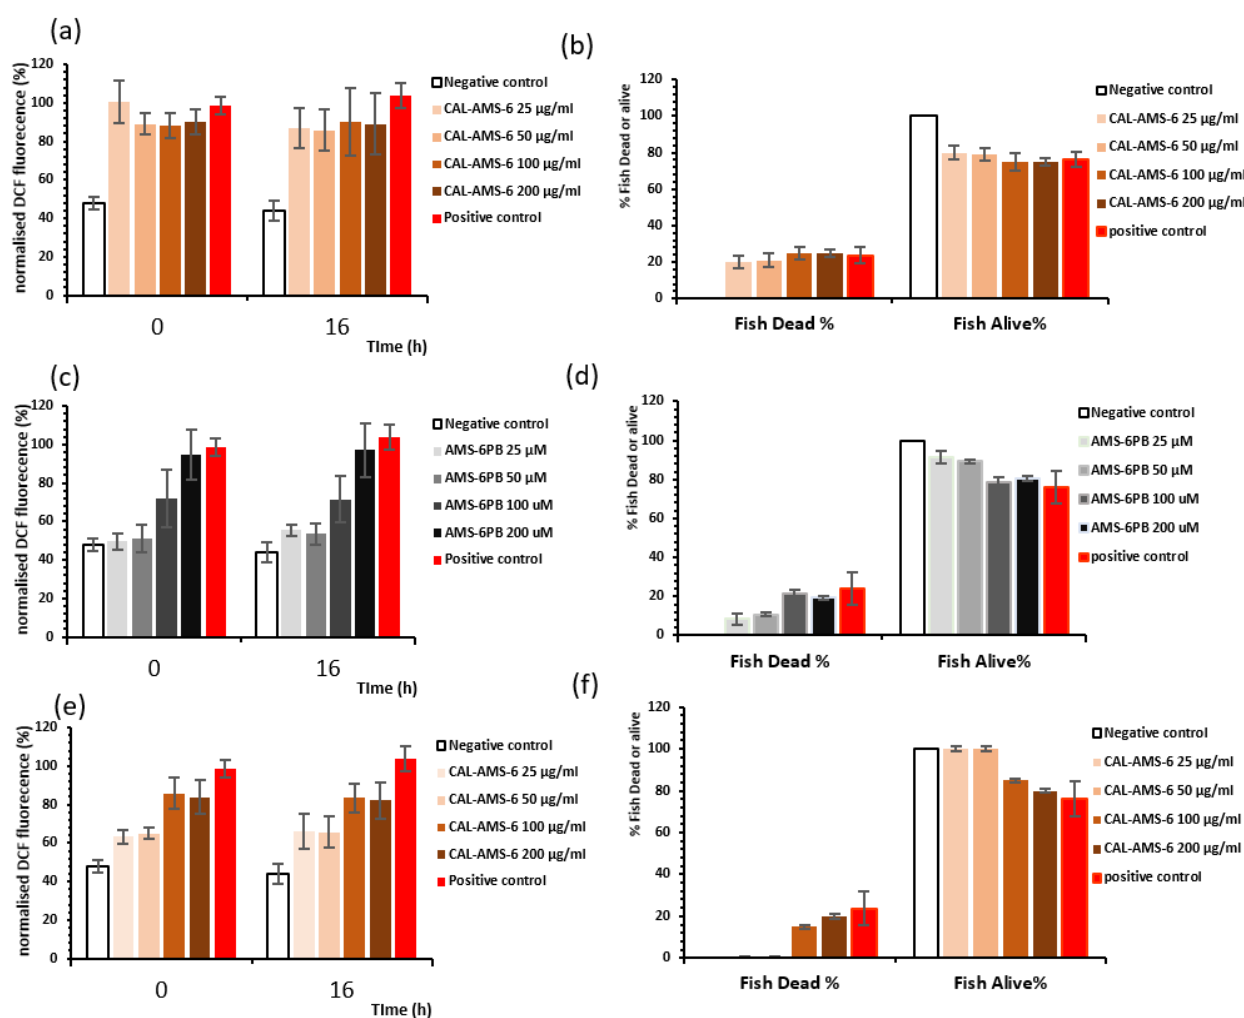

**Figure S7.** (a) Measured DCF fluorescence intensity in zebrafish embryo (2dpf) pre-treated with CAL-AMS-6 at different concentrations for 24 h, 5 mM H<sub>2</sub>O<sub>2</sub> for 1 h, and 25  $\mu$ M DCFDA for 45 min. (b) Percentage of fish dead or alive ( $n=12$ ) at the end of the DCF measurement (16 h) as observed under bright field microscopy. (c) Measured DCF fluorescence intensity in zebrafish following pre-treatment with test compound AMS-6PB at different concentrations for 24 h, 5 mM H<sub>2</sub>O<sub>2</sub> for 1 h, and 25  $\mu$ M DCFDA for 45 min. (d) Percentage of fish dead or alive ( $n=12$ ) at the end of the DCF measurement (16 h) as observed under bright field microscopy. (e) Measured DCF fluorescence in zebrafish embryo pre-treated with CAL-AMS-6 at different concentrations, followed by 45 min

incubation with 25  $\mu$ M DCFDA for 45 min. (f) Percentage of fish dead or alive ( $n=12$ ) at the end of the DCF measurement (16 h) as observed under bright field microscopy. DCF measurement were normalised to the positive control and expressed as a percentage.

## References

1. Simon, B.C.; Haudenschild, C.C.; Cohen, R.A. Preservation of endothelium-dependent relaxation in atherosclerotic rabbit aorta by probucol. *J. Cardiovasc. Pharmacol.* **1993**, *21*, 893–901.
2. Zheng, H.; Gao, C.; Che, S. Amino and quaternary ammonium group functionalized mesoporous silica: An efficient ion-exchange method to remove anionic surfactant from AMS. *Microporous Mesoporous Mater.* **2008**, *116*, 299–307.
3. Inoue, N.; Ohara, Y.; Fukai, T.; Harrison, D.G.; Nishida, K.i. Probucol improves endothelial-dependent relaxation and decreases vascular superoxide production in cholesterol-fed rabbits. *Am. J. Med. Sci.* **1998**, *315*, 242–247.
